# Supplementary material for: BRCA1/2 pathogenic variants in triple-negative versus luminal-like breast cancers: genotype–phenotype correlation in a cohort of 531 patients
Source: PubMed Central journal article supplement — Ther Adv Med Oncol. 2020 Dec 16;12:1758835920975326. doi: 10.1177/1758835920975326 (PMC7747114; doi:10.1177/1758835920975326), 2020-12-16
Supplement: sj-pdf-1-tam-10.1177_1758835920975326.pdf [file sj-pdf-1-tam-10.1177_1758835920975326.pdf]

# BRCA1/2 pathogenic variants in Triple-Negative *versus* Luminal-like Breast Cancers: genotype-phenotype correlation in a cohort of 531 patients.

Lorena Incorvaia<sup>1,†</sup>, Daniele Fanale<sup>2,†</sup>, Marco Bono<sup>2,†</sup>, Valentina Calò<sup>2</sup>, Alessia Fiorino<sup>2</sup>, Chiara Brando<sup>2</sup>, Lidia Rita Corsini<sup>2</sup>, Sofia Cutaia<sup>2</sup>, Daniela Cancelliere<sup>2</sup>, Alessia Pivetti<sup>2</sup>, Maria La Mantia<sup>2</sup>, Nadia Barraco<sup>2</sup>, Stefania Cusenza<sup>2</sup>, Giuseppe Badalamenti<sup>2,#</sup>, Antonio Russo<sup>2,\*,#</sup> and Viviana Bazan<sup>2,#</sup>

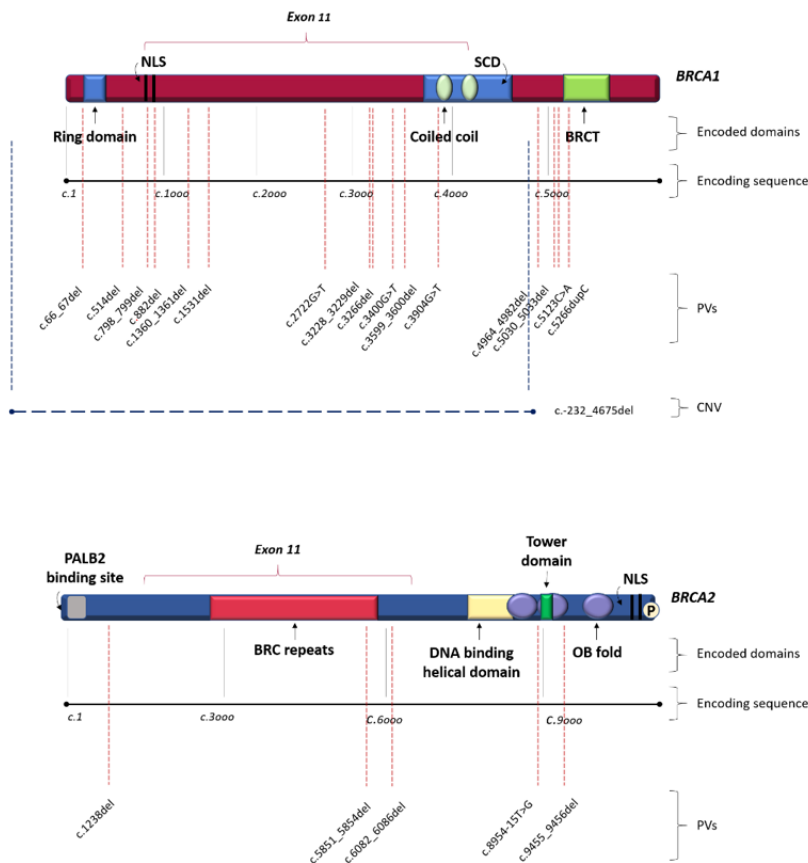

Supplementary Figure 1. Gene location of BRCA1/2 PVs in TNBC patients.

Abbreviations: BRCT, BRCA1 C-terminus domain; CNV, Copy Number Variant; NLS, Nuclear Localization Sequence; OB, Oligonucleotide Binding; PV, Pathogenic Variant; SCD, Serine Cluster Domain.

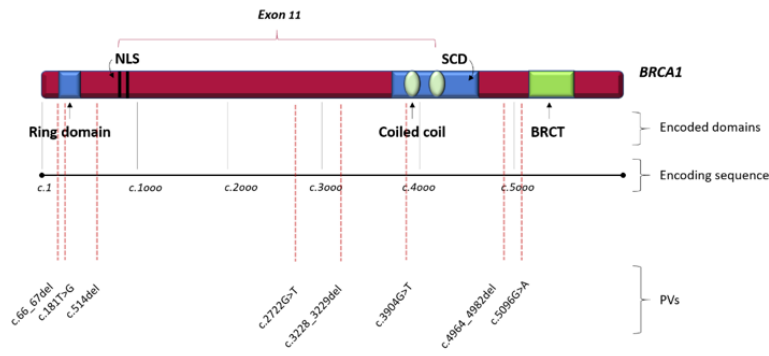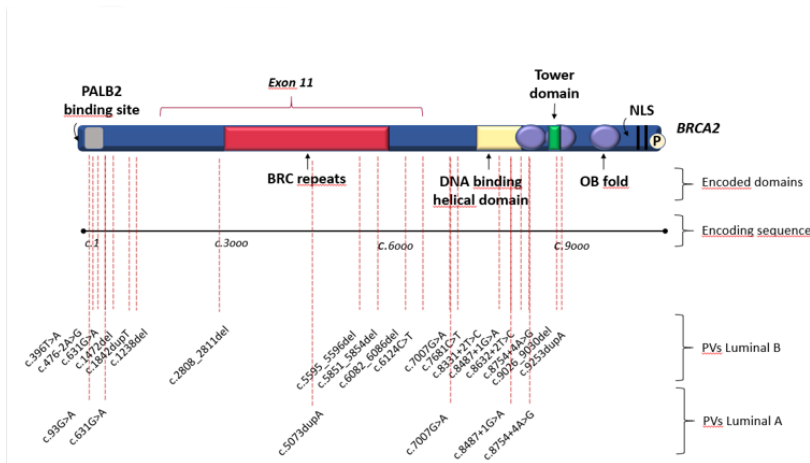

**Supplementary Figure 2. Gene location of BRCA1/2 PVs in luminal-like BC patients.**

Abbreviations: BRCT, BRCA1 C-terminus domain; NLS, Nuclear Localization Sequence; OB, Oligonucleotide Binding; PV, Pathogenic Variant; SCD, Serine Cluster Domain.
